# Supplementary material for: Effects of Two Weekly Servings of Cod for 16 Weeks in Pregnancy on Maternal Iodine Status and Infant Neurodevelopment: Mommy's Food, a Randomized-Controlled Trial
Source: PubMed Central journal article supplement (PMC7891220; doi:10.1089/thy.2020.0115), 2021-02-12
Supplement: Supp_TableS1.pdf [file Supp_TableS1.pdf]

**Supplementary Table 1.** Difference in baseline characteristics between completers 11 months and non-completers 11 months.

| Characteristic                          | <i>n</i> | Completers   | <i>n</i> | Non-completers | <i>p-value</i> <sup>b</sup> |
|-----------------------------------------|----------|--------------|----------|----------------|-----------------------------|
| Age, in years, mean (SD)                | 114      | 29.4 (3.7)   | 21       | 28.5 (4.4)     | 0.50                        |
| BMI, kg/m <sup>2</sup>                  | 112      | 23.2 (4.2)   | 20       | 22.5 (3.0)     | 0.81                        |
| Education, %                            | 112      |              | 68       |                |                             |
| ≥ 12 years                              | 13       | 11.6         | 6        | 28.6           |                             |
| 13-16 years                             | 30       | 26.8         | 3        | 14.3           |                             |
| > 16 years                              | 69       | 61.6         | 12       | 57.1           |                             |
| Household Income (NOK <sup>a</sup> ), % | 112      |              | 21       |                | 0.38                        |
| Low (<200 000 - 549 999)                | 31       | 27.2         | 8        | 34.8           |                             |
| Medium (550 000 - 1 249 999)            | 65       | 57.0         | 12       | 52.2           |                             |
| High (1 250 000) > 2 000 000)           | 16       | 14.0         | 1        | 4.3            |                             |
| Nicotine use in pregnancy c, yes, %     | 112      |              | 20       |                |                             |
| ≤ gestational week 8                    | 11       | 9.8          | 1        | 5.0            | NA                          |
| > gestational week 8                    | 0        |              | 0        | 0              |                             |
| Iodine intake (µg/day), median (IQR)    | 114      | 152 (87-255) | 20       | 143 (88-281)   | 0.83                        |

<sup>a</sup> One hundred NOK=\*11.6 USD/10.2 EUR.

<sup>b</sup> Paired sampled *t*-test for comparison of numerical values and Pearson's chi square test for comparison of categorical values between groups.

<sup>c</sup> No participants reported use of nicotine after gestational week 8.

Abbreviations: SD. Standard deviation; BMI, body mass index; NOK, Norwegian Krone; IQR, inter quartile range.
