# Supplementary material for: Effects of Two Weekly Servings of Cod for 16 Weeks in Pregnancy on Maternal Iodine Status and Infant Neurodevelopment: Mommy's Food, a Randomized-Controlled Trial
Source: PubMed Central journal article supplement (PMC7891220; doi:10.1089/thy.2020.0115), 2021-02-12
Supplement: Supp_TableS2.pdf [file Supp_TableS2.pdf]

**Supplementary Table 2.** Red blood cell DHA concentration at baseline and post intervention in the Mommy’s Food trial participants.

|                             | RBC DHA (µg/g) |           | Difference between groups post intervention |                              |
|-----------------------------|----------------|-----------|---------------------------------------------|------------------------------|
|                             | Baseline       | Post      | Crude                                       | Adjusted                     |
|                             | Mean (SD)      | Mean (SD) | <i>p</i> -value <sup>a</sup>                | <i>p</i> -value <sup>b</sup> |
| <b>Control (n= 55)</b>      | 136 (24)       | 137 (41)  | <i>0.13</i>                                 | <i>0.09</i>                  |
| <b>Intervention (n= 61)</b> | 140 (37)       | 149 (39)  |                                             |                              |

<sup>a</sup> Independent sampled t-test for comparison of log transformed values. <sup>b</sup> One-way analysis of covariance (ANCOVA) for comparison of differences between control and intervention group adjusted for pre DHA (µg/g). Abbreviations: DHA, docosahexaenoic acid; RBC, red blood cell.
